# Supplementary material for: High-fat-diet-induced obesity causes an inflammatory and tumor-promoting microenvironment in the rat kidney
Source: PubMed Central journal article supplement — Dis Model Mech. 2012 Mar 15;5(5):627–35. doi: 10.1242/dmm.009407 (PMC3424460; doi:10.1242/dmm.009407), 2012-03-15
Supplement: supp_009407_DMM009407TableS1-S2.pdf [file supp_009407_DMM009407TableS1-S2.pdf]

**Supplemental Table S1:** Taqman probe sets (Applied Biosystems)

| <b>Gene</b>                                          | <b>Short name</b> | <b>Probe set ID</b> |
|------------------------------------------------------|-------------------|---------------------|
| Interleukin 6                                        | Il-6              | Rn99999011_m1       |
| Interleukin 6 receptor                               | IL6R              | Rn00566707_m1       |
| Interleukin 1 $\beta$                                | IL-1 $\beta$      | Rn00676333_g1       |
| Tumor necrosis factor alpha                          | TNF               | Rn99999017_m1       |
| Monocyte chemotactic protein 1                       | MCP-1             | Rn00580555_m1       |
| Leptin                                               | LE                | Rn00565158_m1       |
| Leptin receptor                                      | LEPR              | Rn00561465_m1       |
| Suppressor of cytokine signaling 3                   | SOCS3             | Rn00585674_s1       |
| Plasminogen-Activator-Inhibitor-1-Protein            | PAI-1             | Rn01481341_m1       |
| Hypoxanthine guanine phosphoribosyl transferase<br>1 | HPRT              | Rn01527840_m1       |

**Supplemental Table S2:** Specific primer sets for fatty acid transport proteins (FATP) 1-6 and hypoxanthine guanine phosphoribosyl transferase 1 (HPRT).

| <b>Gene</b>        | <b>Forward (5' – 3')</b> | <b>Reverse (5' – 3')</b> |
|--------------------|--------------------------|--------------------------|
| FATP1<br>(Slc27a1) | CCTCACATCACAGCAGGAGA     | GCTCTGTCCACACCCTTCAT     |
| FATP2<br>(Slc27a2) | ACAAAGTAGACGGGGTGTCG     | GCATGGTGGTGTAGATGACG     |
| FATP3<br>(Slc27a3) | CCAGTACATTGGGGAGCTGT     | CTGCTGTCCCGTGTAGTTGA     |
| FATP4<br>(Slc27a4) | AAGACAGAGTTGCGGAAGGA     | CTAGCTTTGGTCCCTTG        |
| FATP5<br>(Slc27a5) | ACGTGTGGGAAACTTCCAG      | ACCCTGTTTGTCCCTCACAG     |
| FATP6<br>(Slc27a6) | CTCTCCTTGAATTGGTGGA      | TGGTCCTTTTCCCCTTCTCT     |
| HPRT               | CAGTCCCAGCGTCGTGATTA     | AGCAAGTCTTTCAGTCCTGTC    |
